# Supplementary material for: Identification and Characterization of Mitogen-Activated Protein Kinase (MAPK) Genes in Sunflower (Helianthus annuus L.)
Source: MDPI journal article supplement (doi:10.3390/plants8020028), 2019-01-22

Clade B

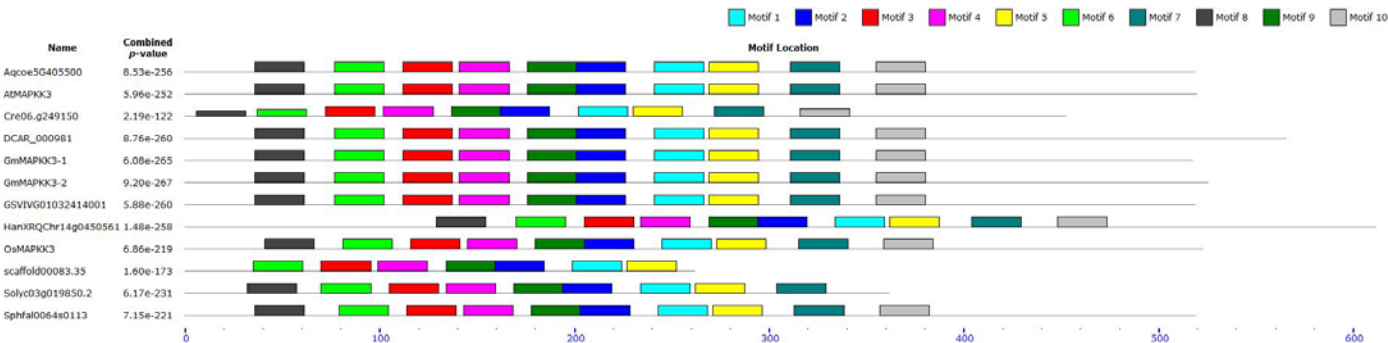

T loop or GTxxYMSPER [Motif 1](#)

- 1.7e-238
- 12 sites

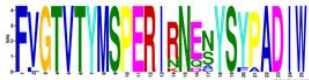

Catalytic C-loop [Motif 2](#)

- 2.1e-211
- 12 sites

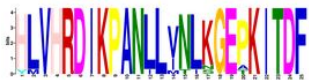

[Motif 3](#)

- 6.7e-207
- 12 sites

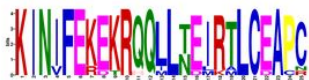

[Motif 4](#)

- 5.5e-201
- 12 sites

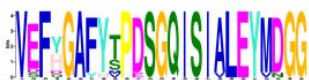

[Motif 5](#)

- 1.6e-187
- 12 sites

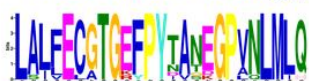

P-loop [Motif 6](#)

- 6.5e-182
- 11 sites

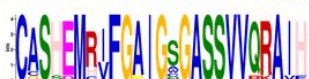

[Motif 7](#)

- 3.2e-158
- 11 sites

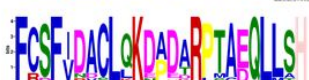

[Motif 8](#)

- 2.1e-145
- 10 sites

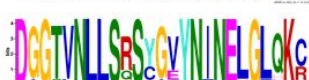

[Motif 9](#)

- 5.8e-132
- 12 sites

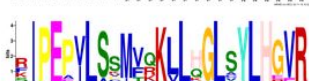

[Motif 10](#)

- 1.0e-125
- 9 sites

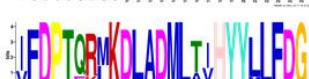

Clade C

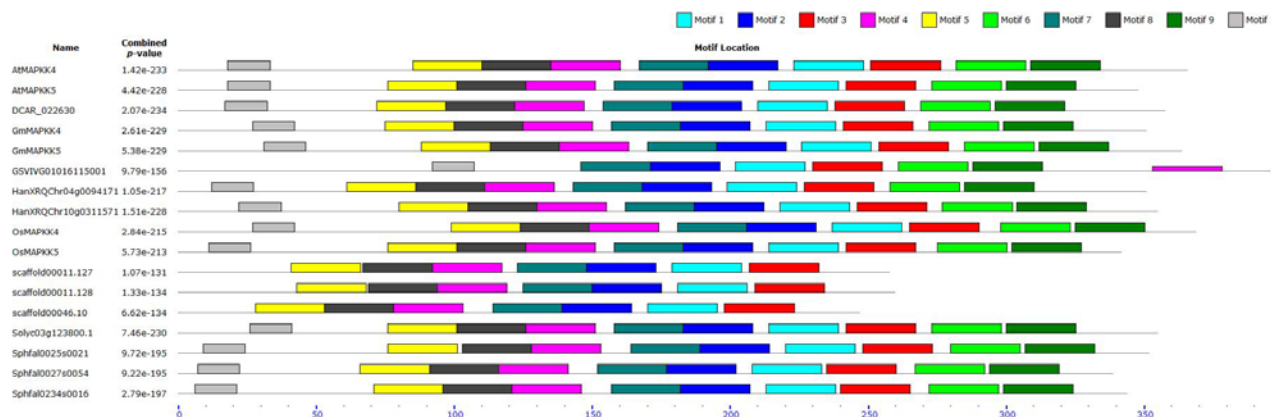

T loop or GTxxYMSPER

[Motif 1](#)

- 8.9e-331
- 17 sites

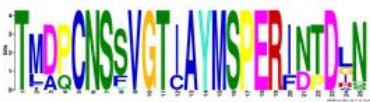

Catalytic C-loop

[Motif 2](#)

- 1.3e-310
- 17 sites

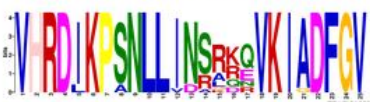

[Motif 3](#)

- 3.3e-292
- 17 sites

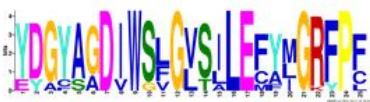

[Motif 4](#)

- 7.4e-252
- 16 sites

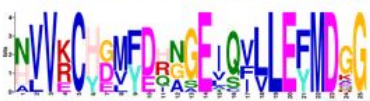

P-loop

[Motif 5](#)

- 4.9e-214
- 16 sites

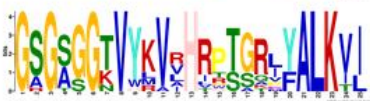

[Motif 6](#)

- 5.6e-225
- 14 sites

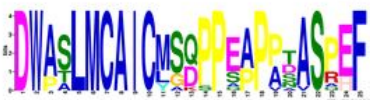

[Motif 7](#)

- 6.7e-186
- 17 sites

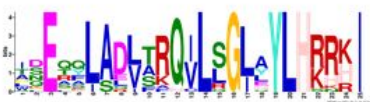

[Motif 8](#)

- 3.3e-179
- 16 sites

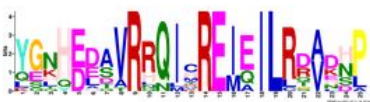

[Motif 9](#)

- 6.9e-186
- 14 sites

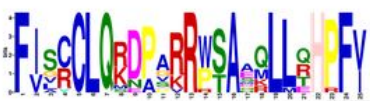

[Motif 10](#)

- 2.5e-069
- 14 sites

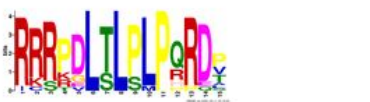

Clade D

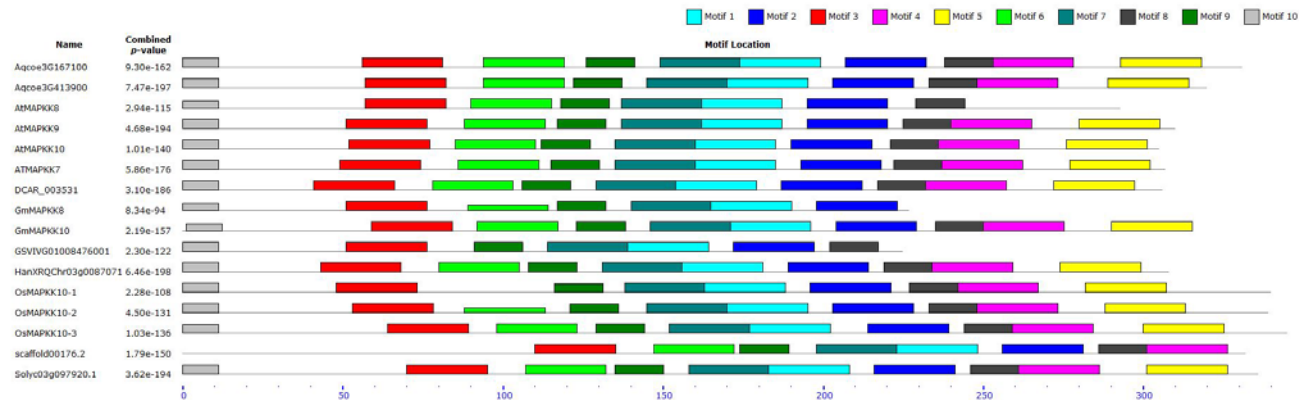

Catalytic C-loop [Motif 1](#)

- 1.0e-243
- 16 sites

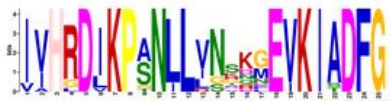

T loop or GTxxYMSPER [Motif 2](#)

- 2.3e-213
- 16 sites

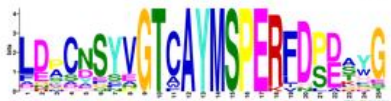

P-loop [Motif 3](#)

- 5.0e-202
- 16 sites

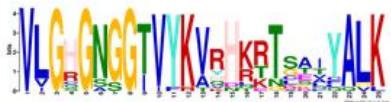

[Motif 4](#)

- 5.9e-190
- 13 sites

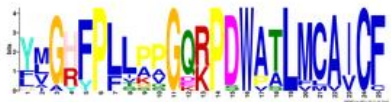

[Motif 5](#)

- 1.1e-129
- 12 sites

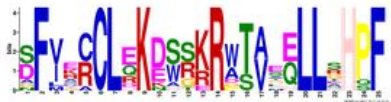

[Motif 6](#)

- 1.8e-112
- 12 sites

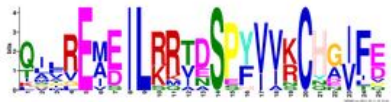

[Motif 7](#)

- 1.5e-109
- 16 sites

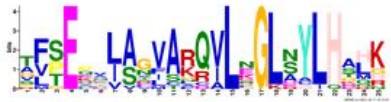

[Motif 8](#)

- 4.1e-105
- 15 sites

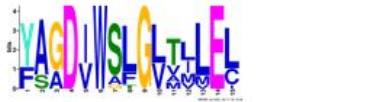

[Motif 9](#)

- 7.2e-085
- 16 sites

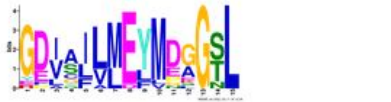

[Motif 10](#)

- 1.8e-040
- 15 sites

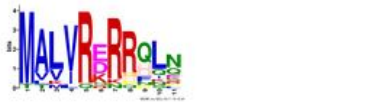

Supplement: s1 [file s1]
